# Supplementary material for: A systematic literature review on the use and outcomes of maternal and child healthcare services by undocumented migrants in Europe
Source: Oxford University Press journal article supplement (doi:10.1093/eurpub/ckx181), 2017-10-03
Supplement: ckx181_ejph-2017-07-srm-0577-file003.docx [file ckx181_ejph-2017-07-srm-0577-file003.docx]

**Appendix 1: Supplementary material - Detailed search query**

[(((((undocumented or illegal or irregular or clandestine or unauthori?ed) AND (migra* or immigra* or exp Transients and Migrants/ or exp Emigrants and Immigrants/ or exp Emigration and Immigration/)) OR (undocumented adj10 migra* or undocumented adj10 immigra* or illegal adj10 migra* or illegal adj10 immigra* or irregular adj10 migra* or irregular adj10 immigra* or clandestine adj10 migra* or clandestine adj10 immigra* or unauthori?ed adj10 migra* or unauthori?ed adj10 immigra* or exp Undocumented Immigrants/ or undocumented patient))) AND (European Union or EU or European Free Trade Association or EFTA or exp Europe/ or exp Europe, Eastern/ or exp European Union/ or Austria or Belgium or Bulgaria or Croatia or Cyprus or Czech Republic or Denmark or Estonia or Finland or France or Germany or Greece or Hungary or Iceland or Ireland or Italy or Latvia or Liechtenstein or Lithuania or Luxembourg or Malta or Netherlands or Norway or Poland or Portugal or Romania or Slovakia or Slovenia or Spain or Sweden or Switzerland or United Kingdom or UK or England or Britain or Wales or Northern Ireland or Scotland)))) AND (matern* or mother and child care or mother and child health or exp Maternal health/ or exp Maternal Health Services/ or exp Maternal Mortality/ or exp Maternal-Child Health Services/ or reproductive* or exp Reproductive health/ or child care or exp Child Care/ or child health or exp Child Health/ or infant health or exp Infant Health/ or infant care or exp Infant Care/ or pregnan* or exp Pregnancy/ or exp Pregnancy Complications/ or antenatal* or childbirth or exp Parturition/ or birth rate or exp Birth Rate/ or birth weight or exp Birth Weight/ or exp Infant, Low Birth Weight/ or premature birth or exp Premature Birth/ or preterm birth or stillbirth or exp Stillbirth/ or birth malformation* or intrapartum* or obstetric* or exp Obstetrics/ or exp Delivery, Obstetric/ or perinatal* or exp Perinatal Care/ or exp Perinatal Death/ or exp Perinatal Mortality/ or prenatal* or exp Prenatal Care/ or postnatal* or exp Postnatal Care/ or postpartum* or exp Postpartum Period/ or pregnancy-related mortality or pregnancy-related death or infant mortality or exp Infant Mortality/ or infant death* or exp Infant Death/ or neonatal mortality or neonatal death* or vaccination or exp Vaccination/)))))]
