# Supplementary material for: A systematic literature review on the use and outcomes of maternal and child healthcare services by undocumented migrants in Europe
Source: Oxford University Press journal article supplement (doi:10.1093/eurpub/ckx181), 2017-10-03
Supplement: ckx181_ejph-2017-07-srm-0577-file005.docx [file ckx181_ejph-2017-07-srm-0577-file005.docx]

**Supplementary material: References**

41. Britz JB, McKee M. Charging migrants for health care could compromise public health and increase costs for the NHS. - Journal of Public Health; 2016 38(2):384-390 28 ref. 2016.

42. Waller H. Gesundheitsprobleme und Gesundheitsversorgung von Menschen in der aufenthaltsrechtlichen Illegalität: Deutschland und Italien im Vergleich (Health Problems and Health-Care among Unregistered Migrants: A Comparison between Germany and Italy). Das Gesundheitswesen. 2008;70(01):4-8.

43. PICUM. Access to Health Care for Undocumented Migrants in Europe. 2007.

44. Karl-Trummer U, Novak-Zezula S, Metzler B. Access to health care for undocumented migrants in the EU: a first landscape of NowHereland. Eurohealth; 2010 16(1):13-16 9 ref.

45. MIPEX. Migrant Integration Policy Index - Health 2015 [Available from: <http://www.mipex.eu/health>.

46. Gray BH, van Ginneken E. Health care for undocumented migrants: European approaches. Issue Brief (Commonwealth Fund). 2012;33:1-12.

47. Feldman R. Maternity care for undocumented migrant women: The impact of charging for care. British Journal of Midwifery. 2016;24(1).

48. Heaman M, Bayrampour H, Kingston D, Blondel B, Gissler M, Roth C, et al. Migrant women’s utilization of prenatal care: a systematic review. Maternal and child health journal. 2013;17(5):816-36.
